# Supplementary material for: A novel quantitative PCR mediated by high-fidelity DNA polymerase
Source: PubMed Central journal article supplement (PMC5583327; doi:10.1038/s41598-017-10782-4), 2017-09-04
Supplement: 41598_2017_10782_MOESM1_ESM.pdf [file 41598_2017_10782_MOESM1_ESM.pdf]

# **A novel quantitative PCR mediated by high-fidelity DNA polymerase**

Mengling Zhang<sup>1,2</sup>, Kyle Liu<sup>1</sup>, Yihong Hu<sup>2</sup>, Yi Lin<sup>3</sup>, Yang Li<sup>2</sup>, Ping Zhong<sup>3</sup>, Xia Jin<sup>4</sup>,  
Xiaoli Zhu<sup>1</sup>, Chiyu Zhang<sup>2,\*</sup>

1 School of Life Sciences, Shanghai University, Shanghai, China

2 Pathogen Diagnostic Center, CAS Key Laboratory of Molecular Virology & Immunology, Institut Pasteur of Shanghai, Chinese Academy of Science, Shanghai, China

3 Shanghai Municipal Center for Disease Control & Prevention, Shanghai, China

4 Viral Disease and Vaccine Translational Research Unit, CAS Key Laboratory of Molecular Virology & Immunology, Institut Pasteur of Shanghai, Chinese Academy of Sciences, Shanghai, China.

**Table S1. The sequence information of oligonucleotides used**

| Targets                         | Primer/probe/template <sup>a</sup> | Sequence (5'-3')                        |
|---------------------------------|------------------------------------|-----------------------------------------|
| H7N9                            | N9-probe-1                         | FAM-ATC ATCACCGCCCACAGTGTACAA-BHQ1      |
|                                 | N9-probe-2                         | BHQ1-ATCATCACCGCCCACAGTGTACAA-FAM       |
|                                 | N9-R1                              | ACATCCTGGATTGCCATCA                     |
| <i>β-actin</i>                  | ACTB-probe-1/A                     | HEX-TGGACTTCGAGCAAGAGATGGCCA-BHQ1       |
|                                 | ACTB-probe-2                       | CY5- TGGACTTCGAGCAAGAGATGGCCA-BHQ3      |
|                                 | ACTB-probe-3                       | TexRed-TGGACTTCGAGCAAGAGATGGCCA-ECLIPSE |
|                                 | ACTB-probe-4                       | FAM-TGGACTTCGAGCAAGAGATGGCCA-TAMRA      |
|                                 | ACTB-probe-5                       | HEX-CATCACCATTTGGCAATGAGCGGTT-BHQ1      |
|                                 | ACTB-probe-G                       | HEX-TGGACTTCGAGCAAGAGATGGCCG-BHQ1       |
|                                 | ACTB-probe-T                       | HEX-TGGACTTCGAGCAAGAGATGGCCT-BHQ1       |
|                                 | ACTB-probe-C                       | HEX-TGGACTTCGAGCAAGAGATGGCCC-BHQ1       |
|                                 | ACTB-F1                            | TGGACTTCGAGCAAGAGATGGCCA                |
|                                 | ACTB-F2                            | GGAAATCGTGCGTGACATTAAG                  |
|                                 | ACTB-R1                            | ATTGCCAATGGTGATGACCTG                   |
| ACTB-R2                         | CAGGAAGGAAGGCTGGAAGA               |                                         |
| The templates of <i>β-actin</i> | ACTB-WT                            | TGGACTTCGAGCAAGAGATGGCCA                |
|                                 | ACTB-Mu1                           | TGGACTTCGAGCAAGAGATGGCCG                |
|                                 | ACTB-Mu2                           | TGGACTTCGAGCAAGAGATGGCGA                |
|                                 | ACTB-Mu3                           | TGGACTTCGAGCAAGAGATGGCTA                |
|                                 | ACTB-Mu4                           | TAGGTCATCACCATTTGGCAAT                  |
|                                 | ACTB-Mu5                           | GAGGTCATCACCATTTGGCAAT                  |
|                                 | ACTB-Mu6                           | TGGACTTCGAGCAAGAGATGGCCT                |
| ACTB-Mu7                        | TGGACTTCGAGCAAGAGATGGCCC           |                                         |
| HIV-1                           | HIV-probe-1                        | BHQ1-GGGGTACAGTGCAGGGGAAAGAA-FAM        |
|                                 | HIV-F1                             | GACAGCAGTACAAATGGCAG                    |
|                                 | HIV-R1                             | TAAACCCGAAAATTTGAATT                    |

|      |              |                                      |
|------|--------------|--------------------------------------|
| ALDH | ALDH-probe-G | FAM-GAGTACGGGCTGCAGGCATACACTG-BHQ1   |
|      | ALDH-probe-A | CY5-GAGTACGGGCTGCAGGCATACACTA-BHQ1   |
|      | ALDH-R1      | CGAGCCACCAGCAGACCCTC                 |
| NL63 | NL63-probe   | FAM-TCAGTGCTCGCTTCAACAACACAACCA-BHQ1 |
|      | NL63-R       | CAGTTATGATTTCACAATGGCCT              |

<sup>a</sup> For the names of oligonucleotides: F, forward primer; R, reverse primer; WT, wild-type; Mu, mutant.

<sup>b</sup> Bold characters indicate the point mutation.

**Table S2. Sequences information of ACTB primers and the corresponding amplicon sizes**

| Name of oligonucleotides | Sequence (5'-3')                  | Sizes of amplicons |
|--------------------------|-----------------------------------|--------------------|
| ACTB-probe-1             | HEX-TGGACTTCGAGCAAGAGATGGCCT-BHQ1 |                    |
| ACTB-R1                  | ATTGCCAATGGTGATGACCTG             | 95 bp              |
| ACTB-R2                  | CAGGAAGGAAGGCTGGAAGA              | 140 bp             |
| ACTB-R3                  | CTCTTCTCCAGGGAGGAGCT              | 55 bp              |
| ACTB-R4                  | GTTTCGTGGATGCCACAGG               | 169 bp             |
| ACTB-R5                  | GAGTTGAAGGTAGTTTCGTGGA            | 181 bp             |
| ACTB-R6                  | CACGTCACACTTCATGATGG              | 200 bp             |
| ACTB-R7                  | GTGGTGCCGCCAGACAGCAC              | 250 bp             |

<sup>a</sup> For the names of oligonucleotides: R, reverse primer;

**Table S3. Comparison of sensitivity between the novel method and other commercial HIV-1 kits**

| Method       | Target gene        | Amplification                             | Sample volume | LOD            | Reference  |
|--------------|--------------------|-------------------------------------------|---------------|----------------|------------|
| HFman PCR    | <i>Integrase</i>   | HFman probe based-qPCR                    | 1 ml          | 23 copies/ml * | This study |
| CAP/CA v1.5  | <i>gag</i>         | TaqMan probe based-qPCR                   | 0.5 ml        | 50 copies/ml   | 1          |
| CAP/CTM v1.0 | <i>gag</i>         | TaqMan probe based-qPCR                   | 1.0 ml        | 48 copies/ml   | 2          |
| CAP/CTM v2.0 | <i>gag</i> and LTR | TaqMan probe based-qPCR                   | 1.0 ml        | 20 copies/ml   | 3          |
| Aptima HIV   | <i>pol</i> and LTR | transcription mediated amplification(TMA) | 0.5 ml        | 30 copies/mL   | 4          |
| Abbott HIV-1 | <i>Integrase</i>   | Double-stranded probe based-qPCR          | 1.0 ml        | 40 copies/ml   | 5          |

LOD, Limit of detection; CAP/CA v1.5, COBAS® AMPLICOR HIV-1 MONITOR Test, v1.5; CAP/CTM v1.0, COBAS® AmpliPrep/COBAS® TaqMan® HIV-1 Test, v1.0; CAP/CTM v2.0, COBAS® AmpliPrep/COBAS® TaqMan® HIV-1 Test, v2.0; Aptima HIV, Hologic Aptima HIV-1 Quant Dx assay; Abbott real-time HIV-1, Abbott m2000 RealTime HIV-1 assay.

\* The LOD of the assay is 23 copies per 25 µl reaction. If 0.5-1 ml plasma is used for producing 50 µl RNA solution, and all RNA solution is used in a 100 µl reaction, the sensitivity of our HIV-1 assay can reach 46-23 copies/ml.

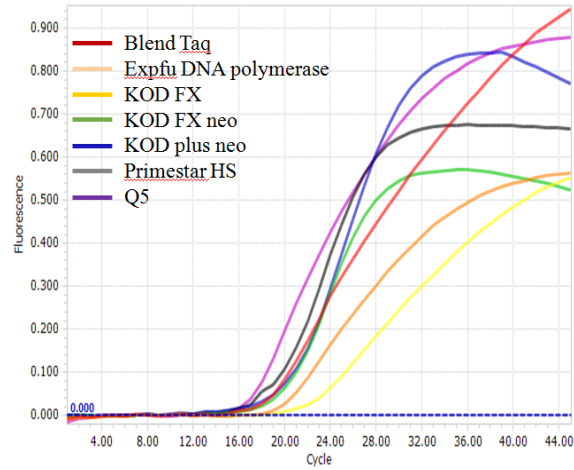

**Fig. S1 Performance of the novel qPCR methods using various high-fidelity DNA polymerases.** Seven high-fidelity DNA polymerases including Blend Taq, Expfu DNA polymerase, KOD FX, KOD FX neo, KOD plus neo, Primestar HS, and Q5 were used to detect  $\beta$ -actin RNA. The corresponding buffer was used for each enzyme with an additional addition of  $1\mu\text{l}$   $75\text{mM}$   $\text{MgCl}_2$ . The real-time fluorescence curve of  $\beta$ -actin RNA produced by ACTB-probe-1 and ACTB-R1.

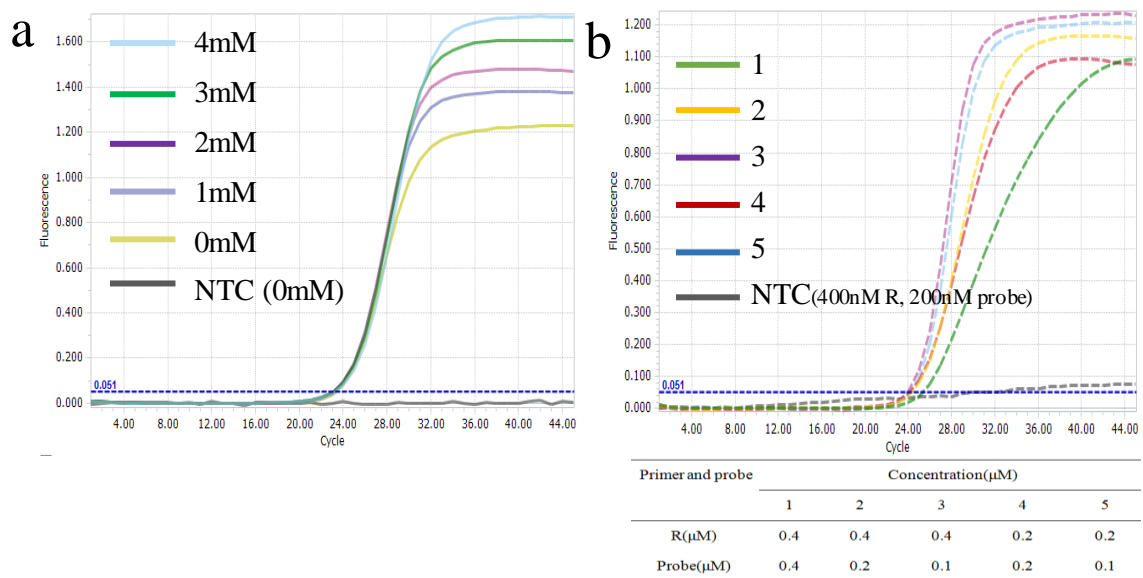

**Fig. S2 Optimization of reaction condition of the novel method.** (a) The influence of  $MgCl_2$  concentration on amplification. (b) The influence of primer and probe concentration of primer and probe on amplification. NTC, non-template control. The real-time fluorescence curve produced by  $\beta$ -actin RNA with ACTB-probe-1 and ACTB-R1.

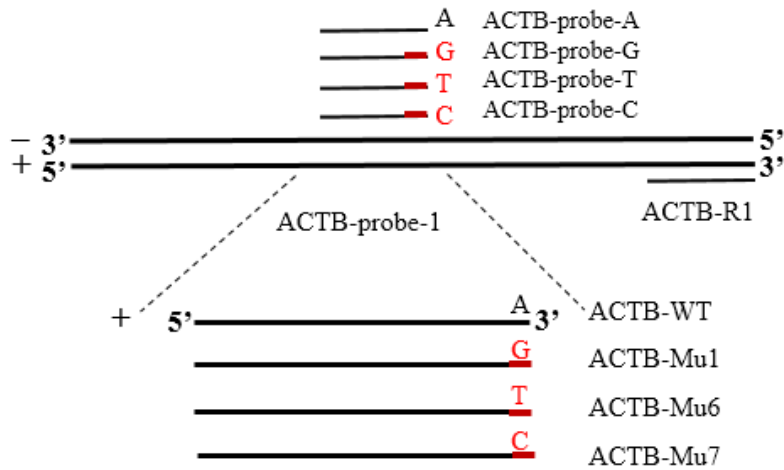

| Template<br>(RNA 10 <sup>4</sup> ) | Threshold cycle (Ct) <sup>a</sup> |              |              |              |
|------------------------------------|-----------------------------------|--------------|--------------|--------------|
|                                    | ACTB-probe-A                      | ACTB-probe-G | ACTB-probe-T | ACTB-probe-C |
| ACTB-WT                            | 24.32                             | 23.79        | 24.06        | 23.56        |
| ACTB-Mu1                           | 25.02                             | 25.38        | 25.26        | 25.35        |
| ACTB-Mu6                           | 24.89                             | 24.57        | 24.39        | 25.15        |
| ACTB-Mu7                           | 26.03                             | 25.62        | 25.66        | 27.58        |

**Fig. S3 The influence of various mismatches between probe/primer and template on the novel qPCR.** The probes were labelled by HEX and BHQ1 at 5' and 3' ends, respectively. 10<sup>4</sup> RNA of *β-actin* RNA standard was used in the experiments. For the sequence information of probes and primers, please see Supplementary Table S1.



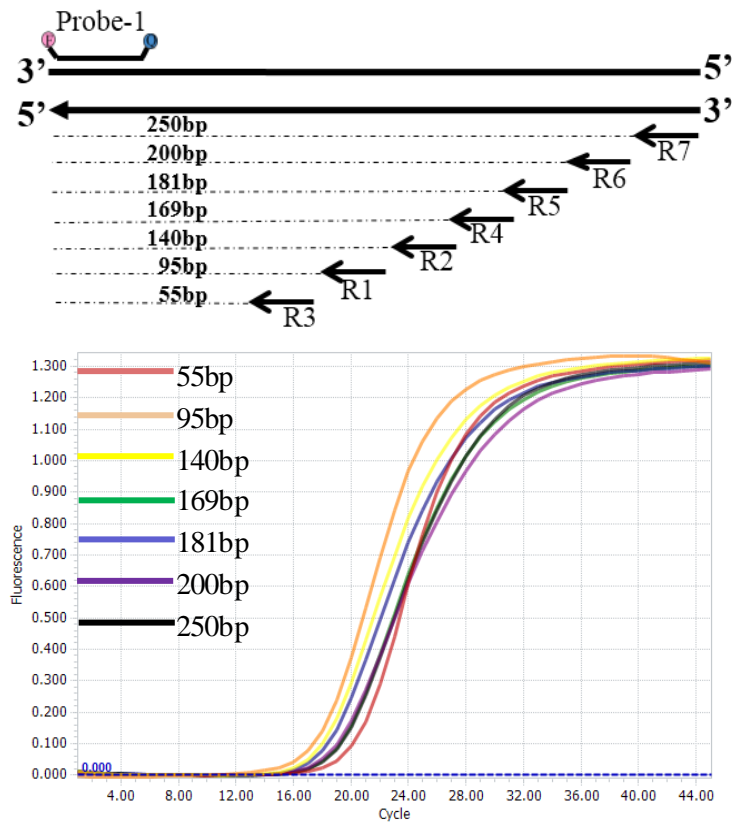

**Fig. S4 Influence of different sizes of amplicons on the amplification of the novel method.** It was conducted by ACTB-probe-1 and ACTB-R1 to detect  $\beta$ -actin RNA. For the sequence information of probes and primers, please see Supplementary Table S1.

HIV-1  
Target sequence: GACAGCAGTACAAATGGCAGTATTCCACAATTTAAAAAGAAAAGGGGGATTGGGGGTACAGTGCAGGGGAAAGAATAGTAGACATAATAGCAACAGACATACAACTAAAGAAT  
Sequence1 (TaqMan): GACAGCAGTACAAATGGCAGTATTCCACAATTTAAAAAGAAAAGGGGGATTGGGGGTACAGTGCAGGGGAAAGAATAGTAGACATAATAGCAACAGACATACAACTAAAGAAT  
Sequence2 (HFman): GGGGTACAGTGCAGGGGAAAGAATAGTAGACATAATAGCAACAGACATACAACTAAAGAAT

$\beta$ -actin  
Target sequence: GGAATCGTGCCTGACATTAAAGGAGAAGCTGTGCTACGTCCCTGGACTTCGAGCAAGAGATGGCCACGGCTGCTCCAGCTCCTCCCTG  
Sequence1 (TaqMan): GGAATCGTGCCTGACATTAAAGGAGAAGCTGTGCTACGTCCCTGGACTTCGAGCAAGAGATGGCCACGGCTGCTCCAGCTCCTCCCTG  
Sequence2 (HFman): TGGACTTCGAGCAAGGTTTGGCCACGGCTGCTCCAGCTCCTCCCTG

**Fig. S5 The sequence alignments of amplicons of the new (HFman) and conventional (TaqMan) qPCR.** The new and conventional methods share reverse primer. The amplicon of the new method is smaller than that of the conventional method.

a

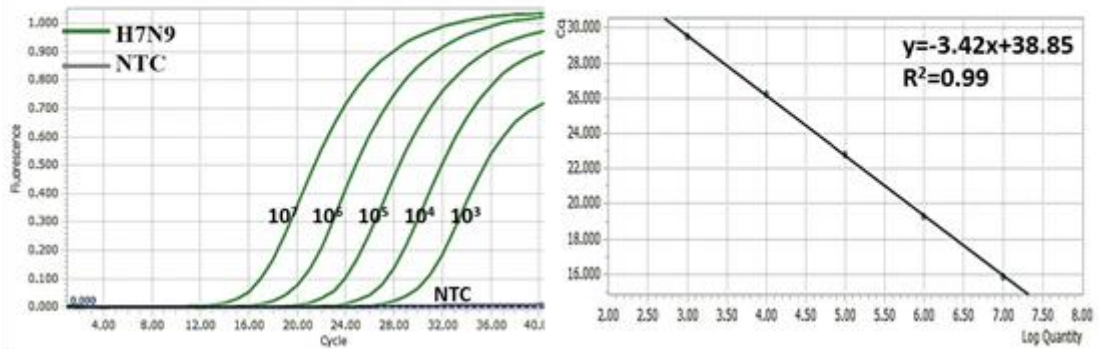

b

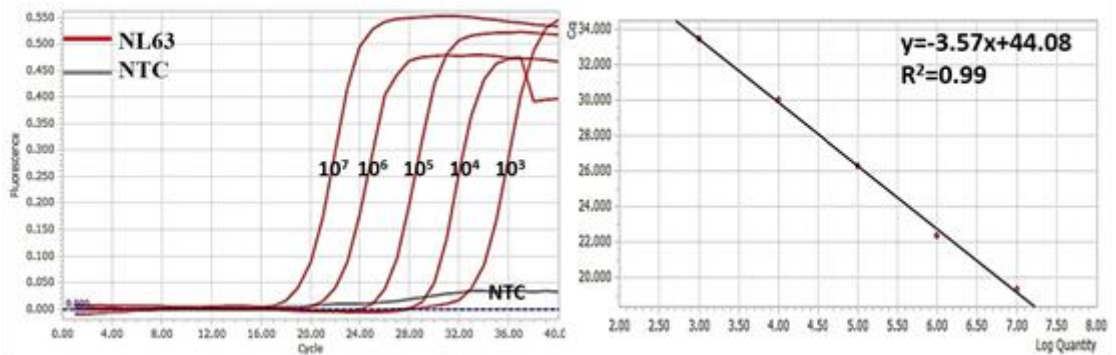

**Fig. S6 Amplification and standard curves of H7N9 (a) and human coronavirus NL63 (b) using the new method.** Amplification curves and standard curves were obtained using ten-fold serial dilutions of RNA standard from  $10^7$ - $10^3$  copies/ $\mu$ l. The concentrations of HFman probe and reverse primer are 100 nM and 400 nM, respectively.

## References

1. Lee, B. G., Fiebelkorn, K. R., Caliendo, A. M., & Nolte, F. S.. Development and verification of an automated sample processing protocol for quantitation of human immunodeficiency virus type 1 RNA in plasma. *Journal of clinical microbiology*. **41**, 2062-2067 (2003).
2. Schumacher W. et al. Fully automated quantification of human immunodeficiency virus (HIV) type 1 RNA in human plasma by the COBAS® AmpliPrep/COBAS® TaqMan® system. *Journal of Clinical Virology*. **38**, 304-312 (2007).
3. Sizmann, D. et al. Improved hiv-1 rna quantitation by cobas ampliprep/cobas taqman hiv-1 test, v2.0 using a novel dual-target approach. *Journal of Clinical Virology*. **49**, 41-46 (2010).
4. Manak, M. et al. Evaluation of the Hologic (Gen-Probe) Aptima HIV-1 RT Quantitative Assay on HIV-1 Subtypes.
5. Michael T. Pyne , Eric Q. Konnick , Amit Phansalkar & David R. Hillyard. Evaluation of the Abbott RealTime HIV-1 Assay.
